# Supplementary material
Source: PubMed Central journal article supplement (PMC3320939)
Supplement: supp_M111.312918_jbc.M111.312918-1.pdf [file supp_M111.312918_jbc.M111.312918-1.pdf]

**Table S1. Primers used in cloning**

|           |                                                                                                                                                                                                                      |
|-----------|----------------------------------------------------------------------------------------------------------------------------------------------------------------------------------------------------------------------|
| PBY7For   | 5'-GAGCTCATGGATTACAAGGACGACGACGACAAGCACGTGGAATT<br>CGCCATGGTTATGATGAGTCGTTATGAAGA-3'                                                                                                                                 |
| PBY7Rev   | 5'-AGCGCTAGGCCTGAGCTCTCATTTCAAAAACATGATGTA-3'                                                                                                                                                                        |
| HAT2For   | 5'GGCTTAAUATGTACCCATACGACGTCCAGACTACGCCCCGGCGGCG<br>CTCGCGGATGCTGCT-3'                                                                                                                                               |
| HAT2Rev   | 5'ACTTAAGCAAUCAAATTCAAAGTTTGACCAGAACCCTGCTGCAG<br>TGTGAGCGTGAAC-3'                                                                                                                                                   |
| PFwbpFor  | 5'-ATTTGCTTAAGUTGGCAGGAGATGTGGAATCTAACCCAGGAC<br>CTATGGATTACAAGGACGACGACG-3'                                                                                                                                         |
| PFwbpRev  | 5'-GGTTTAAUTCATTTCAAAAACATGAT-3'                                                                                                                                                                                     |
| PwbpFor   | 5'-TCTAGAATGATGAGTCGTTATGAAGAGC-3'                                                                                                                                                                                   |
| PT2Rev    | 5'-GAGCTCCTACTGCTGCAGGTTGAGCGT-3'                                                                                                                                                                                    |
| PFlagFor  | 5'-TCTAGAATGGATTACAAGGACGACGACGACAAG-3'                                                                                                                                                                              |
| PBY9For   | 5'-CTGCAGATGAAGACCGCCGCTCTTGACCCGCTCTTCTTCTCCC<br>CTCTGCCCTCGCCACTACTCACGTGCATCATCATCATCACAGTAG<br>CGGCCTGGTGCCGCGCGGCAGCCATATGGCTAGCATGACTGGTGGAC<br>AGCAAATGGGTCCGGATCCGAATTCTGTCACCTCGGCCCCGGACACC<br>AGGCCGGC-3' |
| PBY9Rev   | 5'-GAGCTCCTAGGTGTCCGGGGCCGAGGT -3'                                                                                                                                                                                   |
| SPMUC1For | 5'-GGCTTAAUATGGGGGCATCGAGGA-3'                                                                                                                                                                                       |
| MUC1Rev   | 5'-GGTTTAAUACTGTATCCGGTGCAGGAAGTGA-3'                                                                                                                                                                                |
| ERWbpPfor | 5'GAGCTCATGAAGACTGCTGCTTTGGCTCCTTTGTTTTTTTGCCTTCT<br>GCTTTGGCTGATTACAAGGACGACGACGA-3'                                                                                                                                |
| ERWbpPrev | 5'AGCGCTAGGCCTGAGCTCTCATAGCTCATCTTTCAAAAACATGATG<br>TACC-3'                                                                                                                                                          |

Supplemental Fig. S1

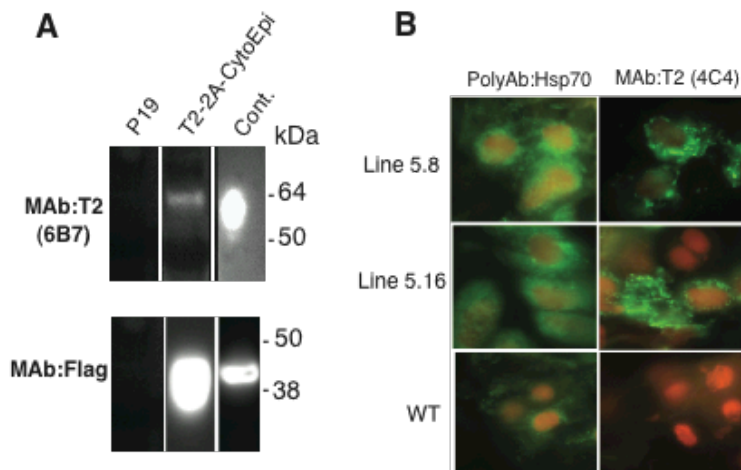

**Supplemental Fig. S1. Expression and rough localization of O-glycosylation machinery comprising human GalNAc-transferase T2 (GalNAc-T2) and Flag-tagged *P. aeruginosa* cytosolic C4-epimerase WbpP (CytoEpi).** *A*, Western blot analysis of Golgi targeted GalNAc-T2 expressed alone or from the 2A linked glycosylation machinery GalNAc-T2-2A-CytoEpi in leaves of *N. benthamiana* demonstrated that both the epimerase and GalNAc-T2 were expressed as their expected molecular sizes 39.7 & 64.7 kDa, respectively. Total proteinaceous extracts of 5-6 days *Agrobacterium* mediated transient expression of the silencing inhibitor construct P19 (empty vector control) and GalNAc-T2-2A-CytoEpi. MAbs 6B7 (upper panel) and anti-Flag M2 (Sigma, lower panel), were used for detection of GalNAc-T2 and Flag-Tagged WbpP (CytoEpi), respectively. Approximately 30  $\mu$ g total protein was loaded in each lane. Positive controls (Cont.): *BvT2* (upper panel) and *EcWbpP* (lower panel), were GalNAc-T2 (200 ng) and Flag-Tagged epimerase (50 ng) expressed and purified from *Baculo virus* Sf9 cells and *E. coli*, respectively. *B*, Immunostainings of GalNAc-T2 in protoplasts of *Nicotiana tabacum* L. cv Bright Yellow 2 (BY2) suspension cells (another tobacco species) stably transformed with GalNAc-T2 (lines 5.8 & 5.16) revealed sub-cellular localization similar to Golgi-like structures using MAb 4C4 (human GalNAc-T2) (1) and as a control HSP70 ER localization using a anti HSP70 polyclonal Ab

(2). Nuclei were visualised using PI stain (orange). Western blots and immunostainings were done as described in Supplemental Experimental Procedures.

### **Supplemental Experimental Procedures.**

*Preparation and Immunostaining of BY-2 Protoplasts* - Tobacco Bright Yellow 2 (BY-2) suspension cells were cultivated, transformed and fermented in accordance to Mayo et al. (2006) (3). 1 ml of BY-2 cells in exponential phase was pelleted gently ( $150 \times g$ ) then resuspended in 1 ml EB (25 mM MES, pH 5.5, 2 mM  $\text{CaCl}_2$ , 600 mM mannitol) containing 0.25% macerozyme (Yakult Honsha Co. Ltd., Japan) and 1% cellulase (Yakult Honsha Co. Ltd., Japan) and incubated for  $\geq 2$  h with mild shaking (45 rpm). The suspension was then pelleted ( $150 \times g$ , RT) and resuspended in 0.5 ml EB. Generation of intact protoplast was checked - either visually (round spherical cells) or with 0.01% Calco flour white (which stains the cell wall) in distilled water for 2 sec to 2 min, then washed briefly in water. Protoplasts were then dried onto Teflon printed diagnostic slides (Immuno-Cell Int., USA). Dried protoplasts were acetone fixed at  $-20^\circ\text{C}$  for 8 min's and airdried 1 h at room temperature. Protoplast permeabilization was done with 5 % BSA incl. 0.2 % saponin for 20 min's at room temperature. Slides were overlaid with primary antibody over night at  $4^\circ\text{C}$ . Slides were incubated with secondary FITC labeled secondary antibodies for 45 min's at room temperature. All washing steps between procedures were done with  $1 \times$  PBS. Finally slides were mounted with fluoromount anti fade and imaged.

### **REFERENCES**

1. Brooks, S. A., Carter, T. M., Bennett, E. P., Clausen, H., and Mandel, U. (2007) *Acta Histochem* **109**, 273-284
2. Geshi, N., Jorgensen, B., and Ulvskov, P. (2004) *Planta* **218**, 862-868
3. Mayo, K. J., Gonzales, B. J., and Mason, H. S. (2006) *Nature protocols* **1**, 1105-1111
